# Supplementary material for: Spectroscopic MRI-Based Biomarkers Predict Survival for Newly Diagnosed Glioblastoma in a Clinical Trial
Source: MDPI journal article supplement (doi:10.3390/cancers15133524), 2023-07-07
Supplement: s1 [file s1]

**Supplemental Table S1.** Details about all 30 patients included in the original study.

| Subject # | Age (years) | IDH status | MGMT status | Resection type | GTV3 volume (cc) | rENH volume (cc) |
|-----------|-------------|------------|-------------|----------------|------------------|------------------|
| 1         | 20.9        | Mutant     | MGMT+       | GTR            | 48.2             | 1.6              |
| 2         | 57.9        | WT         | WT          | STR            | 23.9             | 2.6              |
| 3         | 64.1        | WT         | MGMT+       | GTR            | 65.0             | 0.2              |
| 4         | 59.0        | WT         | WT          | GTR            | 19.3             | 1.4              |
| 5         | 55.9        | WT         | WT          | GTR            | 18.5             | 0.0              |
| 6         | 71.6        | WT         | WT          | GTR            | 16.5             | 0.0              |
| 7         | 38.1        | WT         | WT          | GTR            | 17.1             | 0.3              |
| 8         | 55.1        | WT         | WT          | GTR            | 6.4              | 0.5              |
| 9         | 60.1        | WT         | WT          | Biopsy         | 20.0             | 15.4             |
| 10        | 64.3        | WT         | MGMT+       | STR            | 20.2             | 2.2              |
| 11        | 65.4        | WT         | WT          | GTR            | 9.5              | 0.5              |
| 12        | 55.7        | WT         | WT          | GTR            | 0.9              | 0.6              |
| 13        | 70.9        | WT         | WT          | Biopsy         | 2.4              | 1.4              |
| 14        | 54.2        | WT         | WT          | Biopsy         | 63.4             | 12.1             |
| 15        | 24.8        | Mutant     | MGMT+       | STR            | 34.8             | 2.9              |
| 16        | 59.6        | WT         | WT          | GTR            | 5.4              | 0.9              |
| 17        | 66.8        | WT         | WT          | STR            | 22.4             | 3.6              |
| 18        | 69.4        | WT         | WT          | STR            | 24.6             | 3.9              |
| 19        | 57.4        | WT         | WT          | STR            | 22.5             | 3.6              |
| 20        | 61.0        | WT         | WT          | GTR            | 4.8              | 0.4              |
| 21        | 60.6        | WT         | MGMT+       | STR            | 40.7             | 7.0              |
| 22        | 42.0        | WT         | WT          | STR            | 4.1              | 0.4              |
| 23        | 59.7        | WT         | WT          | Biopsy         | 33.6             | 11.3             |
| 24        | 58.8        | WT         | MGMT+       | Biopsy         | 55.6             | 5.0              |
| 25        | 57.4        | WT         | MGMT+       | GTR            | 7.6              | 4.9              |
| 26        | 68.2        | WT         | WT          | STR            | 19.1             | 13.3             |
| 27        | 49.8        | WT         | MGMT+       | STR            | 15.7             | 5.1              |
| 28        | 50.7        | WT         | WT          | STR            | 19.4             | 2.0              |
| 29        | 42.8        | WT         | WT          | GTR            | 31.6             | 0.5              |
| 30        | 69.6        | WT         | WT          | STR            | 19.1             | 2.9              |

**Abbreviations.** IDH, isocitrate dehydrogenase; WT, wild type; MGMT, O<sup>6</sup>-methylguanine-DNA methyltransferase; MGMT+, MGMT hypermethylated; GTR, gross total resection; STR, subtotal resection; GTV3, gross tumor volume 3; rENH, residual post-contrast enhancement.
